# Supplementary material for: Dosimetric Validation of a GAN-Based Pseudo-CT Generation for MRI-Only Stereotactic Brain Radiotherapy
Source: PubMed Central journal article supplement (PMC7959466; doi:10.3390/cancers13051082), 2021-03-03
Supplement: cancers-13-01082-s001.pdf [file cancers-13-01082-s001.pdf]

Supplementary Materials

## Dosimetric Validation of a GAN-Based Pseudo-CT Generation for MRI-Only Stereotactic Brain Radiotherapy

Vincent Bourbonne, Vincent Jaouen, Clément Hognon, Nicolas Boussion, François Lucia, Olivier Pradier, Julien Bert, Dimitris Visvikis and Ulrike Schick

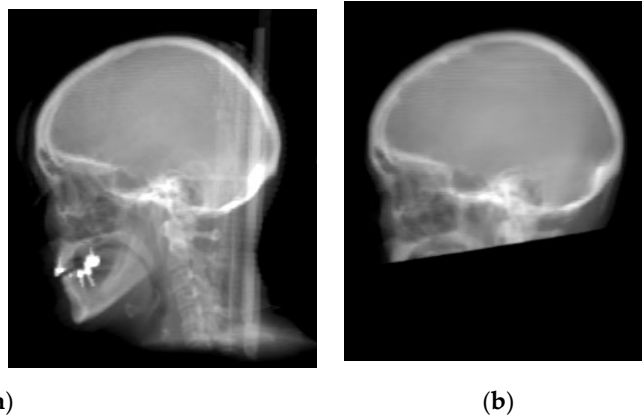

**Figure S1.** Example of DRRs comparison: original CT scan (a) and synthetic CT scan (b).

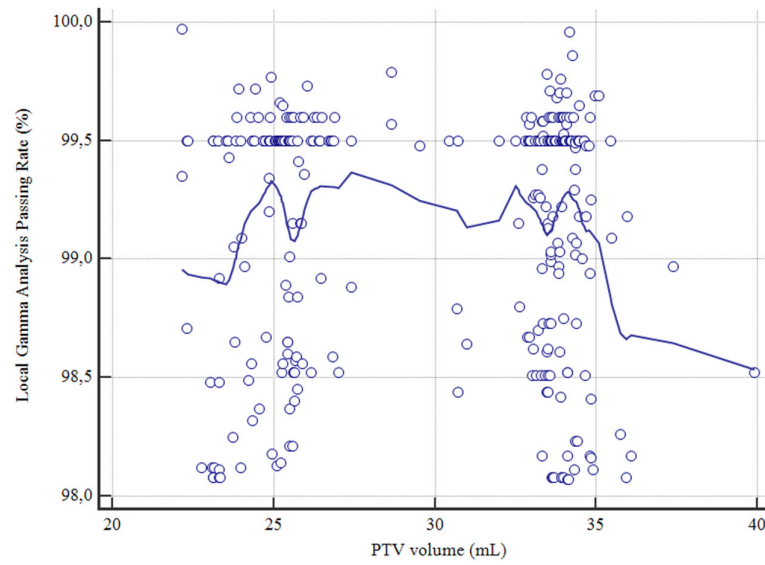

**Figure S2.** Representation of the local Gamma Analysis passing rate (%) depending on the volume of the treated PTV (mL). Abbreviations: PTV: Planning Target Volume (mL), blue line : Local Regression Smoothing Line with a 20% span.

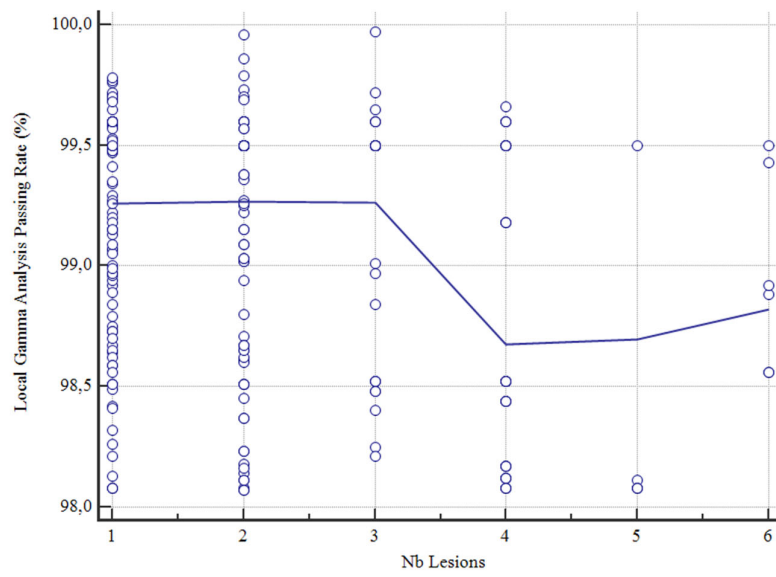

**Figure S3.** Representation of the local Gamma Analysis passing rate (%) depending on the number of treated metastases. Abbreviations: Nb: number, blue line: Local Regression Smoothing Line with a 20% span

**Table S1.** Results of the Local and Global Gamma Analyses for each criteria (2% / 2mm, 2% / 1mm and 1% / 1mm).

| Gamma Analysis        | Dose   | 2% / 2 mm | 2% / 1 mm | 1% / 1 mm |
|-----------------------|--------|-----------|-----------|-----------|
| Local Gamma Analysis  | Median | 99.5      | 98.0      | 87.1      |
|                       | Mean   | 99.1      | 97.99     | 87.4      |
|                       | SD     | 0.53      | 0.96      | 3.66      |
| Global Gamma Analysis | Median | 99.8      | 99.7      | 99.5      |
|                       | Mean   | 99.7      | 99.6      | 99.2      |
|                       | SD     | 0.39      | 0.28      | 5.26      |

**Table S2.** DVH comparisons between the Initial dose and the Synthetic dose maps for the Organs at Risks.

| Organ at Risk     | Dose       | Initial |      |      | Synthetic |      |      | Absolute Difference |       |      |          | Relative Difference |
|-------------------|------------|---------|------|------|-----------|------|------|---------------------|-------|------|----------|---------------------|
|                   |            | Median  | Mean | SD   | Median    | Mean | SD   | Median              | Mean  | SD   | <i>p</i> | Mean (%)            |
| Optic Chiasma     | Dmax (Gy)  | 1.16    | 2.59 | 3.41 | 1.18      | 2.63 | 3.45 | 0.00                | 0.04  | 0.10 | 0.90     | 1.54                |
|                   | Dmean (Gy) | 0.73    | 1.74 | 2.20 | 0.74      | 1.77 | 2.24 | 0.00                | 0.03  | 0.06 | 0.89     | 1.72                |
|                   | D2 (Gy)    | 1.06    | 2.43 | 3.15 | 1.11      | 2.46 | 3.19 | 0.00                | -0.03 | 1.06 | 0.89     | -1.23               |
|                   | D50 (Gy)   | 0.75    | 1.71 | 2.15 | 0.76      | 1.73 | 2.19 | 0.00                | -0.03 | 0.75 | 0.96     | -1.75               |
|                   | D98 (Gy)   | 0.51    | 1.26 | 1.62 | 0.52      | 1.29 | 1.65 | 0.00                | -0.02 | 0.51 | 0.95     | -1.59               |
| Left Optic Nerve  | Dmax (Gy)  | 0.83    | 1.94 | 2.31 | 0.81      | 1.97 | 2.36 | 0.00                | 0.03  | 0.09 | 0.90     | 1.55                |
|                   | Dmean (Gy) | 0.44    | 1.24 | 1.54 | 0.45      | 1.26 | 1.56 | 0.00                | 0.01  | 0.04 | 0.89     | 0.81                |
|                   | D2 (Gy)    | 0.79    | 1.83 | 2.16 | 0.77      | 1.85 | 2.21 | 0.00                | -0.02 | 0.79 | 0.92     | -1.09               |
|                   | D50 (Gy)   | 0.41    | 1.23 | 1.54 | 0.41      | 1.23 | 1.56 | 0.00                | 0.00  | 0.41 | 1        | 0.00                |
|                   | D98 (Gy)   | 0.29    | 0.81 | 1.13 | 0.28      | 0.81 | 1.14 | 0.00                | 0.00  | 0.29 | 0.93     | 0.00                |
| Right Optic Nerve | Dmax (Gy)  | 0.82    | 1.88 | 2.36 | 0.84      | 1.92 | 2.42 | 0.00                | 0.03  | 0.10 | 0.86     | 1.60                |
|                   | Dmean (Gy) | 0.39    | 1.14 | 1.53 | 0.40      | 1.16 | 1.57 | 0.00                | 0.02  | 0.05 | 0.89     | 1.75                |
|                   | D2 (Gy)    | 0.77    | 1.77 | 2.23 | 0.79      | 1.79 | 2.28 | 0.00                | -0.02 | 0.77 | 0.93     | -1.13               |
|                   | D50 (Gy)   | 0.39    | 1.10 | 1.52 | 0.38      | 1.10 | 1.55 | 0.00                | 0.00  | 0.39 | 1        | 0.00                |
|                   | D98 (Gy)   | 0.25    | 0.76 | 1.17 | 0.25      | 0.75 | 1.19 | 0.00                | 0.00  | 0.25 | 0.93     | 0.00                |
| Left Eye          | Dmax (Gy)  | 1.21    | 1.82 | 2.05 | 1.24      | 1.83 | 2.09 | 0.00                | 0.02  | 0.09 | 0.96     | 1.10                |
|                   | Dmean (Gy) | 0.36    | 0.83 | 1.05 | 0.36      | 0.83 | 1.05 | 0.00                | 0.00  | 0.02 | 1        | 0.00                |
|                   | D2 (Gy)    | 1.01    | 1.59 | 1.78 | 0.99      | 1.59 | 1.79 | 0.00                | 0.00  | 1.01 | 1        | 0.00                |
|                   | D50 (Gy)   | 0.23    | 0.80 | 1.10 | 0.24      | 0.80 | 1.09 | 0.00                | 0.00  | 0.23 | 1        | 0.00                |
|                   | D98 (Gy)   | 0.11    | 0.30 | 0.52 | 0.11      | 0.31 | 0.53 | 0.00                | -0.01 | 0.11 | 0.85     | -3.33               |
| Right Eye         | Dmax (Gy)  | 1.00    | 1.56 | 1.87 | 0.99      | 1.57 | 1.88 | 0.00                | 0.00  | 0.05 | 0.96     | 0.00                |
|                   | Dmean (Gy) | 0.31    | 0.72 | 0.97 | 0.30      | 0.73 | 0.98 | 0.00                | 0.00  | 0.02 | 0.92     | 0.00                |
|                   | D2 (Gy)    | 0.78    | 1.36 | 1.63 | 0.78      | 1.37 | 1.64 | 0.00                | -0.01 | 0.78 | 0.95     | -0.74               |
|                   | D50 (Gy)   | 0.23    | 0.70 | 1.02 | 0.24      | 0.71 | 1.03 | 0.00                | 0.00  | 0.23 | 0.92     | 0.00                |
|                   | D98 (Gy)   | 0.10    | 0.28 | 0.48 | 0.10      | 0.29 | 0.49 | 0.00                | 0.00  | 0.10 | 0.83     | 0.00                |

|                        |            |       |       |      |       |       |      |       |       |      |      |       |
|------------------------|------------|-------|-------|------|-------|-------|------|-------|-------|------|------|-------|
| <b>Left Lens</b>       | Dmax (Gy)  | 0.39  | 0.96  | 1.27 | 0.39  | 0.96  | 1.26 | 0.00  | 0.00  | 0.04 | 1    | 0.00  |
|                        | Dmean (Gy) | 0.21  | 0.74  | 1.08 | 0.22  | 0.74  | 1.07 | 0.00  | 0.00  | 0.05 | 1    | 0.00  |
|                        | D2 (Gy)    | 0.40  | 0.97  | 1.26 | 0.40  | 0.98  | 1.28 | 0.00  | -0.01 | 0.40 | 0.94 | -1.03 |
|                        | D50 (Gy)   | 0.25  | 0.77  | 1.10 | 0.26  | 0.77  | 1.09 | 0.00  | 0.00  | 0.25 | 1    | 0.00  |
|                        | D98 (Gy)   | 0.15  | 0.59  | 0.91 | 0.15  | 0.58  | 0.88 | 0.00  | 0.01  | 0.15 | 0.91 | 1.69  |
| <b>Right Lens</b>      | Dmax (Gy)  | 0.33  | 0.83  | 1.11 | 0.33  | 0.83  | 1.11 | 0.00  | 0.00  | 0.04 | 1    | 0.00  |
|                        | Dmean (Gy) | 0.23  | 0.61  | 0.84 | 0.22  | 0.62  | 0.85 | 0     | 0.01  | 0.09 | 0.90 | 1.64  |
|                        | D2 (Gy)    | 0.34  | 0.83  | 1.08 | 0.35  | 0.83  | 1.08 | 0.00  | 0.00  | 0.34 | 1    | 0.00  |
|                        | D50 (Gy)   | 0.23  | 0.63  | 0.84 | 0.22  | 0.63  | 0.86 | 0.00  | -0.01 | 0.23 | 1    | -1.59 |
|                        | D98 (Gy)   | 0.15  | 0.48  | 0.67 | 0.14  | 0.48  | 0.68 | 0.00  | -0.01 | 0.15 | 1    | -2.08 |
| <b>Left Inner ear</b>  | Dmax (Gy)  | 1.62  | 3.40  | 5.93 | 1.62  | 3.39  | 5.60 | 0.00  | 0.01  | 0.71 | 0.99 | 0.29  |
|                        | Dmean (Gy) | 1.01  | 2.28  | 2.59 | 1.16  | 2.35  | 2.64 | 0.00  | 0.02  | 0.05 | 0.78 | 0.88  |
|                        | D2 (Gy)    | 1.51  | 2.95  | 3.32 | 1.45  | 2.97  | 3.34 | 0.00  | 0.00  | 0.16 | 0.95 | 0.00  |
|                        | D50 (Gy)   | 1.11  | 2.37  | 2.67 | 1.04  | 2.40  | 2.69 | 0.00  | -0.01 | 0.11 | 0.91 | -0.42 |
|                        | D98 (Gy)   | 0.85  | 1.89  | 2.18 | 0.77  | 1.91  | 2.22 | 0.00  | -0.01 | 0.09 | 0.95 | -0.53 |
| <b>Right Inner Ear</b> | Dmax (Gy)  | 1.26  | 2.41  | 3.50 | 1.30  | 2.48  | 3.57 | 0.00  | 0.02  | 0.10 | 0.84 | 0.83  |
|                        | Dmean (Gy) | 0.73  | 1.83  | 2.71 | 0.77  | 1.88  | 2.75 | 0.00  | 0.02  | 0.04 | 0.85 | 1.09  |
|                        | D2 (Gy)    | 1.26  | 2.47  | 3.42 | 1.33  | 2.51  | 3.46 | 0.00  | -0.01 | 0.09 | 0.91 | -0.40 |
|                        | D50 (Gy)   | 0.93  | 1.94  | 2.75 | 0.87  | 1.97  | 2.78 | 0.00  | -0.01 | 0.07 | 0.91 | -0.52 |
|                        | D98 (Gy)   | 0.62  | 1.55  | 2.22 | 0.58  | 1.58  | 2.26 | 0.00  | -0.01 | 0.06 | 0.89 | -0.65 |
| <b>Hypophysis</b>      | Dmax (Gy)  | 1.38  | 2.82  | 3.14 | 1.40  | 2.87  | 3.18 | 0.00  | 0.01  | 0.06 | 0.87 | 0.35  |
|                        | Dmean (Gy) | 0.78  | 2.10  | 2.32 | 0.77  | 2.13  | 2.34 | 0.00  | 0.01  | 0.04 | 0.90 | 0.48  |
|                        | D2 (Gy)    | 1.37  | 2.69  | 2.87 | 1.41  | 2.72  | 2.90 | 0.00  | -0.02 | 0.12 | 0.92 | -0.74 |
|                        | D50 (Gy)   | 0.83  | 2.11  | 2.29 | 0.91  | 2.13  | 2.31 | 0.00  | -0.01 | 0.08 | 0.93 | -0.47 |
|                        | D98 (Gy)   | 0.59  | 1.58  | 1.78 | 0.67  | 1.61  | 1.80 | 0.00  | -0.01 | 0.07 | 0.86 | -0.63 |
| <b>Brainstem</b>       | Dmax (Gy)  | 5.46  | 7.83  | 7.71 | 5.74  | 7.90  | 7.77 | 0.02  | 0.08  | 0.19 | 0.93 | 1.02  |
|                        | Dmean (Gy) | 1.38  | 2.46  | 2.90 | 1.39  | 2.48  | 2.92 | 0.00  | 0.02  | 0.05 | 0.94 | 0.81  |
|                        | D2 (Gy)    | 0.00  | 1.71  | 5.79 | 0.00  | 1.74  | 5.81 | 0.00  | 0.02  | 0.16 | 0.96 | 1.17  |
|                        | D50 (Gy)   | 4.04  | 6.41  | 6.91 | 4.10  | 6.45  | 6.98 | -0.01 | -0.04 | 0.18 | 0.95 | -0.62 |
|                        | D98 (Gy)   | 0.89  | 2.19  | 2.89 | 0.89  | 2.21  | 2.91 | 0.00  | -0.02 | 0.05 | 0.94 | -0.91 |
| <b>Brain</b>           | Dmax (Gy)  | 0.11  | 0.23  | 0.34 | 0.10  | 0.23  | 0.34 | 0.00  | 0.00  | 0.03 | 1    | 0.00  |
|                        | Dmin (Gy)  | 0.01  | 0.03  | 0.05 | 0.01  | 0.03  | 0.05 | 0.00  | 0.00  | 0.01 | 1    | 0.00  |
|                        | Dmax (Gy)  | 33.39 | 30.43 | 4.57 | 33.75 | 30.85 | 4.60 | 0.44  | 0.42  | 0.26 | 0.35 | 1.38  |

|            |       |       |      |       |       |      |       |       |      |      |       |
|------------|-------|-------|------|-------|-------|------|-------|-------|------|------|-------|
| Dmean (Gy) | 2.11  | 2.40  | 1.36 | 2.13  | 2.43  | 1.38 | 0.03  | 0.03  | 0.03 | 0.82 | 1.25  |
| V10 (mL)   | 3.72  | 4.97  | 4.27 | 3.80  | 5.10  | 4.34 | 0.09  | 0.12  | 0.11 | 0.76 | 2.41  |
| V21 (mL)   | 1.02  | 1.24  | 1.06 | 1.06  | 1.28  | 1.09 | 0.03  | 0.04  | 0.05 | 0.70 | 3.23  |
| D2 (Gy)    | 14.39 | 14.87 | 5.45 | 14.60 | 15.07 | 5.58 | -0.21 | -0.20 | 0.42 | 0.71 | -1.34 |
| D50 (Gy)   | 0.43  | 1.01  | 1.24 | 0.44  | 1.02  | 1.25 | 0.00  | -0.01 | 0.04 | 0.93 | -0.99 |
| D98 (Gy)   | 0.04  | 0.07  | 0.09 | 0.03  | 0.07  | 0.09 | 0.00  | 0.00  | 0.03 | 1    | 0.00  |

Abbreviations: VxGy : volume receiving x Gy (mL), Dmax : maximum dose, Dmean : mean dose, Dmin : minimum dose, Dx :dose received by x % of the volume (Gy), SD : standard deviation.
